# Supplementary material
Source: HighWire-hosted journal article supplement (https://www.annfammed.org/highwire/filestream/7716/field_highwire_adjunct_files/0/Rittenhouse_Supp_App.pdf)
Supplement: Rittenhouse_Supp_App.pdf [file Rittenhouse_Supp_App.pdf]

**Online Supplemental Material**

Rittenhouse DR, Fryer GE Jr, Phillips RL Jr, et al. Impact of Title VII training programs on community health center staffing and National Health Service Corps participation. *Ann Fam Med*. 2008;6(5):397-405.

<http://www.annfammed.org/cgi/content/full/6/5/397/DC1>

---

**Supplemental Appendix. Title VII Primary Care Training Grants Descriptions**

**Predoctoral Training Grants**

To assist schools of allopathic medicine and osteopathic medicine in meeting the costs of projects to plan, develop, and operate professional predoctoral training programs in the fields of family medicine, general internal medicine, and general pediatrics.

**Departmental Academic Administrative Unit (Academic Unit) Grants**

To establish or expand academic units of family medicine, general internal medicine, and general pediatrics. An academic unit in family medicine means a department or division of a school of allopathic or osteopathic medicine that has direct responsibility for academic primary care activity in family medicine, general internal medicine, or general pediatrics.

To provide support to schools of medicine and osteopathy to meet the costs of projects to establish and maintain academic administrative units (which may be departments, divisions, or other units) to provide clinical instruction in family medicine.

**Residency Training Grant Descriptions, by Type**

To provide support to public or nonprofit private hospitals to plan, develop, and operate an approved professional training program in the field of family medicine. Funds may be awarded for the expansion and improvement of approved residency training programs in family medicine and for the support of residents in family medicine.

To assist graduate training programs in family medicine, general internal medicine, and general pediatrics to expand and improve the quality of residency training programs that prepare graduates to enter primary care.

To provide financial assistance (including resident support) to schools of medicine and osteopathy to plan, develop, and operate approved residency programs in internal medicine or pediatrics emphasizing training for practice in general internal medicine or general pediatrics.
